# Supplementary material
Source: HighWire-hosted journal article supplement (https://ejhp.bmj.com/highwire/filestream/155930/field_highwire_adjunct_files/2/ejhpharm-2024-004098supp003_data_supplement.pdf)
Supplement: ejhpharm-2024-004098supp003_data_supplement.pdf [file ejhpharm-2024-004098supp003_data_supplement.pdf]

Supplementary File 3: Algorithm for use of MMAT

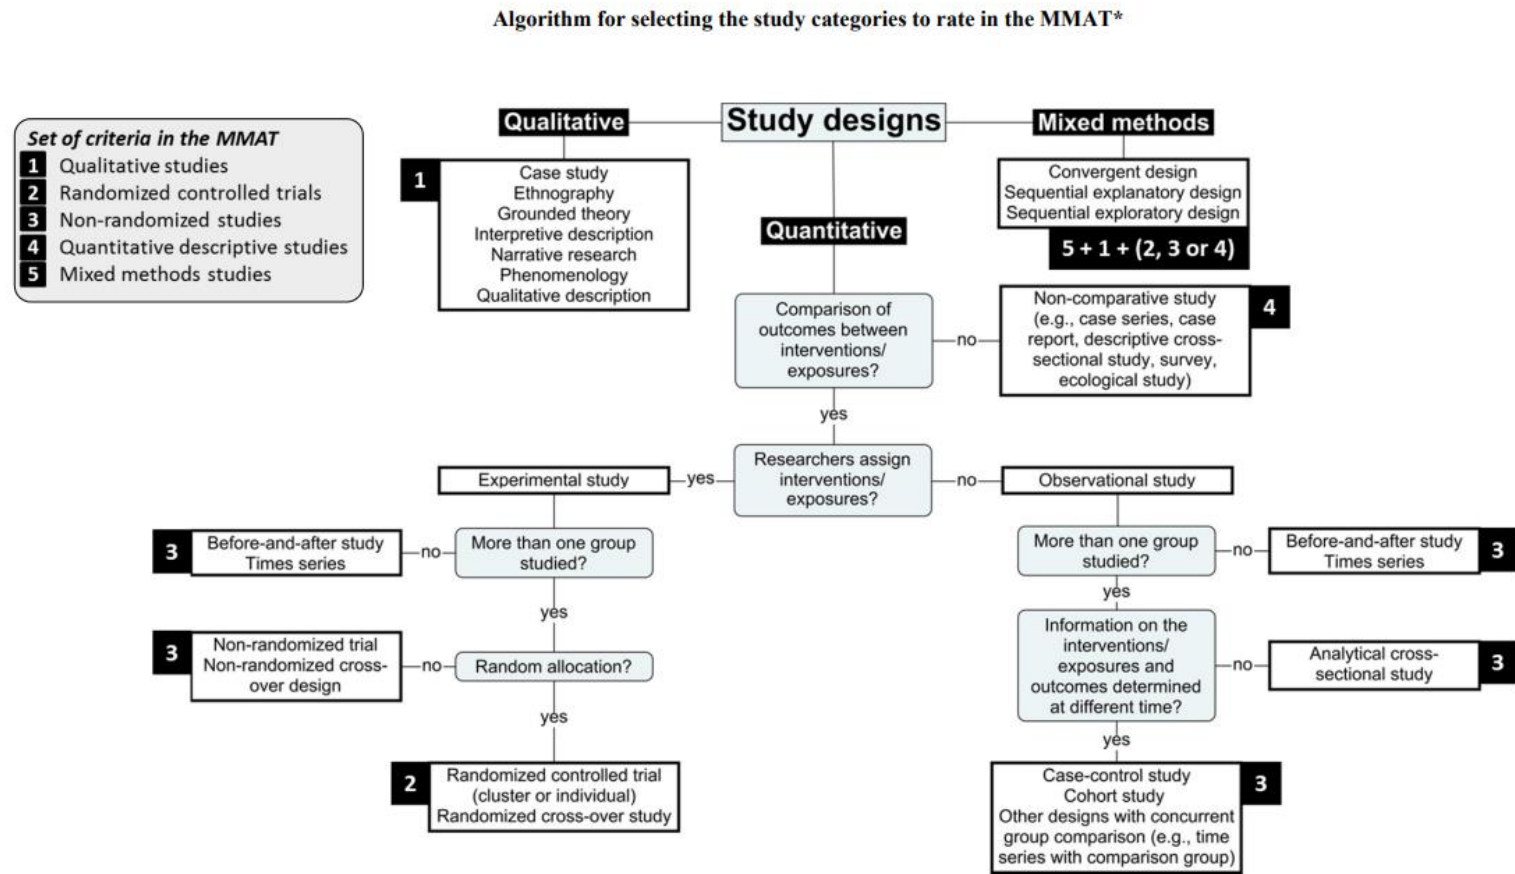

\*Adapted from National Institute for Health Care Excellence. (2012). *Methods for the development of nice public health guidance*. London: National Institute for Health and Care Excellence; and Scottish Intercollegiate Guidelines Network. (2017). *Algorithm for classifying study design for questions of effectiveness*. Retrieved December 1, 2017, from [http://www.sign.ac.uk/assets/study\\_design.pdf](http://www.sign.ac.uk/assets/study_design.pdf).
